# Supplementary material
Source: Springer Nature journal article supplement (https://www.springermedizin.de/resource/supplementary/12986_2011_401_MOESM1_ESM.pdf/25655968)

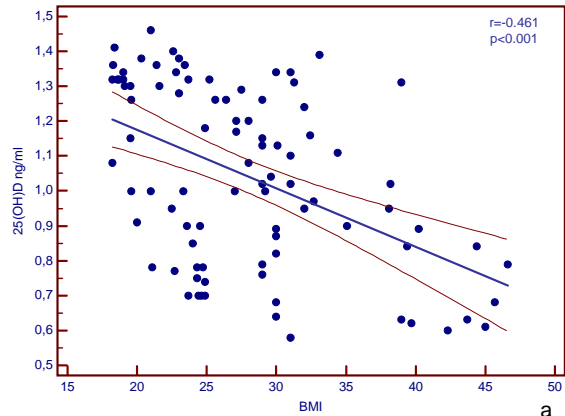

a

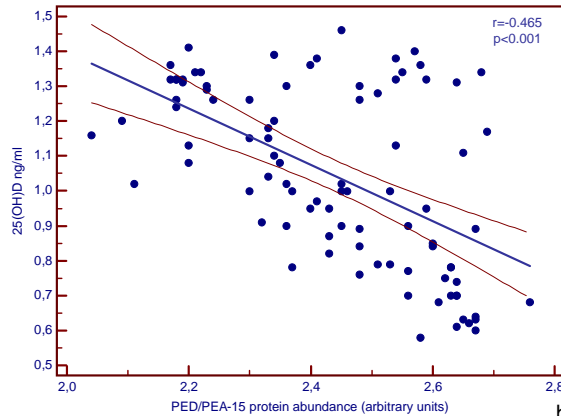

b

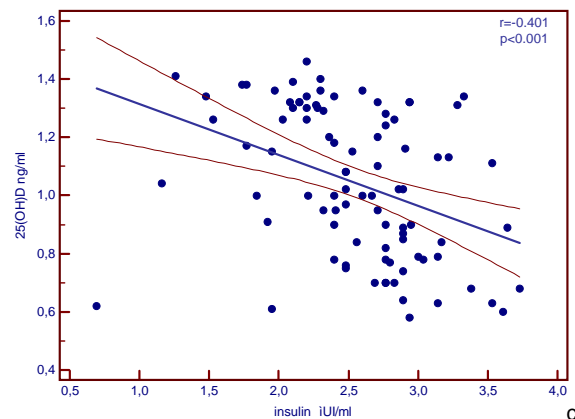

c

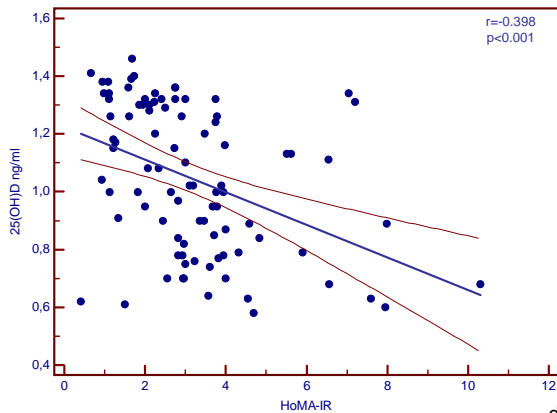

d

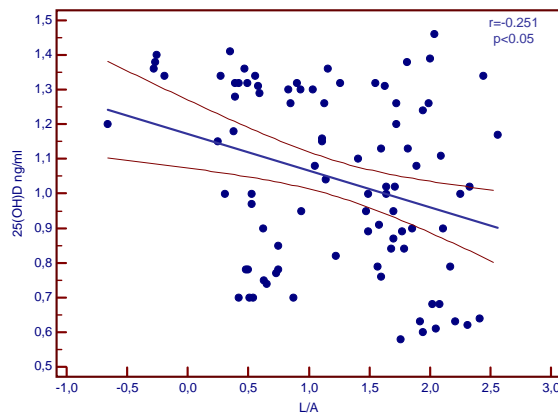

e

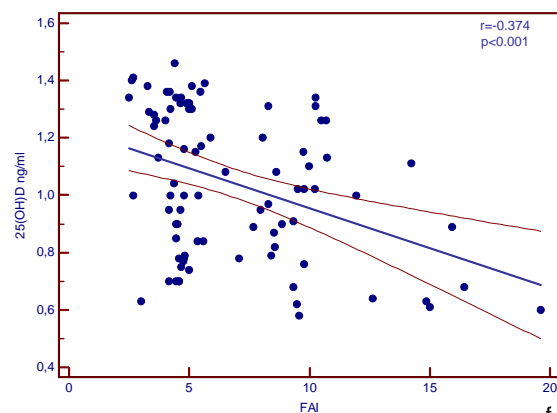

f

Supplement: MOESM1 [file 25655968]
